1     **Environmental and geographic data optimize *ex situ* collections and the preservation of**  
2                                     **adaptive evolutionary potential**

3                                     Lionel N. Di Santo<sup>1,2</sup> and Jill A. Hamilton<sup>1</sup>

4  
5     <sup>1</sup> North Dakota State University, Department of Biological Sciences, 1340 Bolley Drive, Stevens  
6     Hall, Fargo, ND, USA

7     <sup>2</sup> [lionel.disanto@ndsu.edu](mailto:lionel.disanto@ndsu.edu)

8  
9     **Keywords:** variance partitioning, isolation-by-distance, isolation-by-environment, simulations,  
10    neutral and functional genetic diversity, plant conservation.

11  
12    **Abstract**

13        Maintenance of biodiversity, through seed banks and botanical gardens where the wealth of  
14    species' genetic variation may be preserved *ex situ*, is a major goal of conservation. However,  
15    challenges can persist in optimizing *ex situ* collections where trade-offs exist between expense,  
16    effort, and conserving species evolutionary potential, particularly when genetic data is not  
17    available. Within this context, we evaluate the genetic consequences of guiding population  
18    preservation using geographic (isolation-by-distance, IBD) and environmental (isolation-by-  
19    environment, IBE) data for *ex situ* collections where provenance data is available. We use  
20    genetic and genomic datasets from 15 plant species to (i) assess the proportion of population  
21    genetic differentiation explained by geographic and environmental factors, and (ii) simulate *ex*  
22    *situ* collections prioritizing source populations based on pairwise geographic or environmental  
23    distances. Specifically, we test the impact prioritizing sampling based on environmental and

24 geographic distances may have on capturing neutral, functional or putatively adaptive genetic  
25 diversity and differentiation. We find that collectively IBD and IBE explain a substantial  
26 proportion of genetic differences among functional (median 45%) and adaptive (median 71%)  
27 loci, but not for neutral loci (median 21.5%). Simulated *ex situ* collections reveal that inclusion  
28 of IBD and IBE increases both allelic diversity and genetic differentiation captured among  
29 populations, particularly for loci that may be important for adaptation. Thus, prioritizing  
30 population collections using environmental and geographic distance data can impact genetic  
31 variation captured *ex situ*. This provides value for the vast majority of plant species for which we  
32 have no genetic data, informing conservation of genetic variation needed to maintain  
33 evolutionary potential within collections.

34

## 35 **Introduction**

36 Genetic variation is fundamentally a prerequisite for adaptive evolution (Carlson et al. 2014).  
37 Consequently, to maintain species' evolutionary potential, conservation often focuses on the  
38 preservation and maintenance of genetic variation. *Ex situ* collections provide one approach to  
39 preserve genetic diversity outside species' native ranges. This includes extensive efforts to  
40 collect, preserve, and maintain variation across the range of different crop species, wild relatives,  
41 and rare or threatened species (Li et al. 2002; Westengen et al. 2013; Naredo et al. 2017). The  
42 Global Strategy for Plant Conservation (GSPC) aims to have at least 75% of endangered plant  
43 species preserved *ex situ* by 2020 and available for use in recovery or restoration (Target 8;  
44 <https://plants2020.net/>). While significant progress has been made, major gaps remain in the  
45 maintenance of genetic variation within collections (Sharrock et al. 2018). Consequently, *ex situ*  
46 programs designed to maintain genetic diversity are yet needed.

47 Traditionally, *ex situ* methods rely on either probabilistic equations (Brown & Marshall  
48 1995; Lawrence et al. 1995), or stochastic resampling using pre-existing genetic datasets to  
49 optimize sampling efforts (Caujapé-Castells & Pedrola-Monfort 2004; Gapare et al. 2008).  
50 However, these approaches have limitations as they either require the availability of genetic data  
51 (population resampling strategy) or make ungeneralizable assumptions of within species  
52 population structure (probability-based strategy; Lockwood et al. 2007). More recently,  
53 simulation-based strategies have been developed and tested to guide sampling practices (Hoban  
54 & Schlarbaum 2014; Hoban 2019). Simulation-based approaches do not require previously  
55 published genetic datasets but enable realistic simulations of population structure using available  
56 estimates of population size and genetic connectivity. To overcome challenges associated with *a*  
57 *priori* data requirements, the use of surrogate data, such as environmental or spatial data, to  
58 estimate neutral and nonneutral genetic variation has received considerable attention (Guerrant Jr  
59 et al. 2013; Whitlock et al. 2016; Hanson et al. 2017). Empirical work has focused mainly on  
60 testing these data surrogates in preserving genetic diversity *in situ* or in wild populations  
61 (Whitlock et al. 2016; Hanson et al. 2017). However, using environmental and geographic data  
62 to optimize *ex situ* sampling could have substantial value to conservation.

63 Evolutionary processes have predictable impacts on the distribution of standing genetic  
64 variation, which may be used to guide *ex situ* collections. IBD or “isolation-by-distance” (Wright  
65 1943) arises when gene flow between geographically distant populations is not enough to  
66 counteract the accumulation of genetic differences via genetic drift or following successive  
67 founder events during colonization (Slatkin 1993; Ledig 2000). In this way, IBD is a proxy for  
68 the relationship between pairwise population geographic and genetic distances associated with  
69 spatial structure and serial colonization across a landscape. Likewise, IBE or “isolation-by-

70 environment” (Wang & Summers 2010) describes the accumulation of genetic differences  
71 between environmentally distinct populations. IBE predicts that environmental differences are  
72 correlated with genetic differences, as selection differs across environments (Keller et al. 2000;  
73 Lowry et al. 2008; McBride & Singer 2010), providing a proxy for the relationship between  
74 genetic and environmental distance (Dobzhansky 1937; Wang & Bradburd 2014). The influence  
75 of geographic and environmental variation in structuring patterns of genetic variation, either  
76 independently or collectively, has received extensive support across taxa (summarize in Sexton  
77 et al. 2014). Given these observations, spatial and environmental data may provide valuable  
78 proxies in designing *ex situ* conservation collections that optimize the preservation of neutral and  
79 nonneutral evolutionary processes.

80 The impact of IBD and IBE on population genetic structure is expected to differ for neutral  
81 and adaptive genetic variation (Table 1). This includes the prediction that IBD will have a greater  
82 influence at neutral loci relative to IBE. IBD reflects past and current demographic history, as  
83 well as the interplay between drift and gene flow in structuring genetic variation, whereas IBE is  
84 influenced by natural selection, largely reflecting adaptive genetic variation. Cumulatively, we  
85 predict that IBD and IBE will explain the greatest proportion of genetic differences among  
86 populations for nonneutral loci. Finally, for those genetic markers underlying functional genetic  
87 diversity, including polymorphisms within genes or expressed sequences, we predict patterns of  
88 IBE and IBD will be intermediate as they may reflect a combination of adaptive and neutrally  
89 evolving loci.

90 The explosion of genetic and genomic datasets publicly available provides a timely  
91 opportunity to compare the contribution of IBD and IBE to genetic structure. In the present  
92 study, we compare the influence of genetic marker type on IBD and IBE. We classify single-

93 sequence repeats (SSRs) and genome-wide single-nucleotide polymorphisms (SNPs) as neutral  
94 genetic variation (neutral class), SNPs identified previously as candidate loci for selection using  
95 statistical or empirical methods as underlying adaptive genetic diversity (adaptive class), and  
96 genetic markers within known genes or expressed sequences (genic SNPs or expressed sequence  
97 tag SSRs) as a functional class. We distinguish functional polymorphisms from neutral and  
98 adaptive classes as these markers estimate quantitative genetic variation and likely represent a  
99 combination of neutral and adaptive processes.

100 To optimize sampling of genetic variation and differentiation *ex situ*, we have re-analyzed  
101 existing genetic and genomic datasets to (i) quantify the impact of IBD and IBE have on  
102 population genetic structure across neutral, functional and putatively adaptive genetic datasets,  
103 and (ii) to evaluate whether inclusion of IBD and IBE during population sampling influences  
104 genetic diversity captured at neutral, functional, and adaptive loci using simulated *ex situ*  
105 collections. We use variation partitioning to disentangle the effect of IBD, IBE, their  
106 intersection, and union on population genetic structure and then simulate *ex situ* collections using  
107 geographic and environmental distance metrics to optimize genetic variation and differentiation  
108 conserved. This study advances our understanding of the role non-genetic factors play in the  
109 distribution of genetic variation across natural populations, providing new parameters to  
110 optimize *ex situ* sampling designs where genomic data may be limited or non-existent.

111

## 112 **Methods**

### 113 **Source of genetic and geographic data**

114 We searched the Dryad Digital Repository (<https://datadryad.org/>) to identify genetic or  
115 genomics datasets for plant species using three discrete search categories: “Population structure

116 plant”, “SSR population structure” and “SNP population structure”. Following this, for inclusion  
117 in our study, a dataset or a subset of a dataset had to meet the following criteria:

- 118 1. Populations were collected range-wide or were sampled across an isolated fraction of a  
119 species’ distribution.
- 120 2. Geographic coordinates (latitude, longitude) were available for each population sampled.
- 121 3. Genetic data, categorized as SSRs (single-sequence repeats), EST-SSRs (expressed  
122 sequence tag SSRs) or SNPs (single-nucleotide polymorphism), were available.

123 Range-wide sampling or sampling of populations spanning a large isolated fraction of a  
124 species’ distribution were required to ensure the majority of a species’ ecological niche space  
125 was captured. In addition, sampling a broad range of environmental and geographic distances  
126 can reduce the likelihood of covariance between environmental and geographic factors (Wang &  
127 Bradburd 2014). Using publicly available databases, population-specific latitude and longitude  
128 were used to model climatic variation associated with geographic provenance. These data were  
129 used in variation partitioning analyses and to calculate pairwise population environmental and  
130 geographic distances for each species. To calculate genetic distances, we included studies using  
131 SSRs, SNPs or EST-SSRs. SNP genotyping varied across studies, therefore we divided SNP  
132 datasets into two categories: SNPs assessed genome-wide (SNPs) and SNPs assessed within  
133 genes (Gen-SNPs). If specific SNPs were identified as being under selection based on previous  
134 work, we included a fifth category, SEL-SNPs. Finally, genetic markers were broadly classified  
135 as either putatively neutral (neutral class: SSRs, SNPs), underlying functional variation  
136 (functional class: EST-SSRs, Gen-SNPs) or putatively adaptive (adaptive class: SEL-SNPs).

137 Overall, we gathered 17 genetic or genomic datasets, in addition to two genomic datasets  
138 received directly from Holliday et al. (2010) (Table 2; Appendix S1). To meet the above criteria,

139 datasets associated with seven of the 15 studied species were sub-sampled and individual  
140 geographic coordinates for one study were averaged to create population-scale coordinates  
141 (Table 2; Appendix S2).

142

### 143 **Environmental data**

144 We used latitude, longitude and elevation associated with population provenance to extract  
145 annual, seasonal, and monthly climate variables using ClimateNA (North America), ClimateSA  
146 (South America), ClimateEU (Europe) or ClimateAP (Asia Pacific)  
147 (<https://sites.ualberta.ca/~ahamann/data.html>) (Appendix S3). Where elevation was not provided,  
148 GPS Visualizer (<http://www.gpsvisualizer.com/elevation>) was used to assign population  
149 elevation values. In total, 80 environmental variables were assigned to each population;  
150 including 79 climate-related variables and elevation. For each of the species, all environmental  
151 variables associated with population origin were filtered, standardized, and transformed to  
152 summarize environmental differences among populations. First, dataset-specific environmental  
153 variables exhibiting no population-level variation were excluded from analyses. Environmental  
154 variables were then standardized and used to conduct a principal component analysis (PCA).  
155 PCA was used to reduce the overall number of environmental variables by summarizing  
156 environmental differences across two major axes of differentiation, which together explain more  
157 than 70% of environmental variation observed between populations (Appendix S4). These two  
158 major PC axes were considered as predictor variables for variation partitioning and used to  
159 calculate population pairwise environmental distances in simulations.

160

### 161 **Variation partitioning analysis**

162 To quantify the contribution of IBD and IBE to genetic divergence within each of the 19  
163 datasets, we conducted a variation partitioning analysis in R (R core Team 2018) using the  
164 “vegan” package (Oksanen et al. 2007). We used standard estimates of population genetic  
165 differentiation re-calculated for all population pairs within each dataset as our response variable.  
166 To account for variation in genetic markers, we used Nei’s  $F_{ST}$  (Nei 1987), as this metric can  
167 provide comparable estimates of population genetic differentiation for both biallelic (e.g. SNPs)  
168 and multi-allelic (e.g. SSRs) loci. For each dataset, population divergence was partitioned  
169 between two sets of predictor variables; including the geographic coordinates (latitude,  
170 longitude) and the two major environmental PC axes (PC1, PC2) associated with each population  
171 within a dataset. Following variation partitioning, we conducted a partial distance-based  
172 redundancy analysis (dbrda) on each dataset to test the significance of (i) variance explained by  
173 each set of predictor variables alone (IBD, IBE; Table 2), and (ii) the variance explained by the  
174 union of predictor variables (IBD∪IBE; Table 2). We did not evaluate the significance of the  
175 variance explained by the intersection of geographically structured environmental variables  
176 (IBD∩IBE; Table 2), as this variance fraction is not testable using dbrda.

177

### 178 **Quantifying the correlation between genetic, environmental and geographic distances**

179 Geographic and environmental distance between population pairs was measured as the  
180 Euclidean distance between populations’ geographic coordinates (latitude, longitude) or  
181 between populations’ two major environmental PC axes (PC1, PC2), respectively. To visualize  
182 and evaluate the covariance structure between genetic, environmental and geographic distance  
183 matrices, we graphed and estimated the correlation between all distance metrics (Table 2;



184 Appendix S5). Correlation coefficients were estimated using the nonparametric mantel test  
185 implemented in the R package “adegenet” (Jombart 2008) for each dataset separately.

186

### 187 **Simulating an *ex situ* collection: an idealized framework**

188 We simulated an idealized *ex situ* conservation collection for each dataset using a customized  
189 R script relying on R packages “adegenet” (Jombart 2008), “hierfstat” (Goudet 2005) and  
190 “data.table” (Dowle & Srinivasan 2019). This simulation measured the amount of genetic  
191 differentiation and the proportion of allelic diversity captured in *ex situ* collections that prioritize  
192 population sampling based on environmental and geographic distances. We simulated *ex situ*  
193 collections using four different population sampling strategies. This included random sampling,  
194 as well as sampling prioritized based on distances between populations’ two major  
195 environmental PC axes (Euclidean environmental distance), sampling based on distances  
196 between populations’ geographic coordinates (Euclidean geographic distance) or both (Fig. 1a).

197 *Ex situ* collections were simulated using between two and the total number of populations  
198 available for each dataset ( $N_p$ , Fig. 1a). Randomized sampling sampled populations without  
199 replacement from the pool of available populations. Environmentally or geographically  
200 prioritized simulations sampled population pairs with the greatest pairwise distances in  
201 decreasing order. Collections simulated using the combination of environmental and geographic  
202 distances sampled population pairs that exhibited the greatest sum of environmental and  
203 geographic distances following standardization, prioritized in decreasing order. All individuals  
204 within each population were sampled as part of the idealized simulation.

205 To compare genetic diversity captured across simulated collections, we estimated two genetic  
206 parameters: Nei’s  $F_{ST}$  and allelic diversity captured ( $A_c/A_d$ ). These indices were chosen as they

207 quantify different aspects of population genetic diversity. Nei's  $F_{ST}$  provides an estimate of  
208 genetic differentiation across sampled populations and  $A_c/A_d$  provides an estimate of the number  
209 of alleles captured in collections ( $A_c$ ) relative to the total number of alleles present within a  
210 dataset ( $A_d$ ). All genetic parameters were estimated in R using the “hierfstat” package.

211 Population sampling and associated genetic summary statistics were simulated 500 times for  
212 each dataset to account for the variance introduced through randomly sampling across  
213 populations. Summary statistics were estimated based on average values across all 500  
214 simulations. No replication was used for environmental and/or geographic distance-based  
215 population sampling, as neither provenance of source populations nor genetic summary statistics  
216 would have changed with repeated iterations.

217 For these idealized simulations, all individuals were sampled within each target population  
218 (equivalent to protecting the entire population), regardless of collection strategy, assuming 100%  
219 of the standing genetic variation was captured. However, monetary or logistical constraints  
220 usually impact the number of individuals that could be sampled within a target population. Given  
221 this, we predict that genetic diversity captured within source populations will vary. To assess  
222 whether insights gained from idealized simulations were maintained under more realistic  
223 conditions, we conducted additional simulations, introducing differences in the amount of  
224 genetic diversity captured between populations (hereafter referred to as realistic simulations).

225

### 226 **Simulating an *ex situ* collection: The realistic framework**

227 To simulate a realistic *ex situ* collection, a subset of individuals was sampled within each  
228 population. This provides the opportunity to evaluate the impact varying genetic diversity  
229 captured within populations may have on total genetic diversity and differentiation captured

230 across populations collected. We assume that *ex situ* collections aim to preserve as much genetic  
231 variation as possible within each population. Within this framework, we postulated that at least  
232 80% of within-population allelic diversity would be captured *ex situ*. Therefore, for each dataset,  
233 we assessed the number of individuals ( $N_{80\%}$ ) that when sampled capture between 80%-100% of  
234 allelic diversity across populations.

235 An additional simulation was used to determine the value of  $N_{80\%}$  for each dataset (Fig. 1b).  
236 For every population,  $N$  individuals (ranging from one up to the size of the smallest population  
237 within the assessed dataset) were randomly sampled without replacement. Following this, the  
238 number of alleles captured for  $N$  individuals ( $A_s$ ) divided by the total number of alleles in the  
239 population ( $A_p$ ) was quantified for each population. Sampling of individuals and quantification  
240 of allelic diversity captured was replicated 500 times for each population and value of  $N$  to  
241 calculate confidence intervals around  $A_s/A_p$  ratios. The number of individuals required to capture  
242 80% or more ( $A_s/A_p \geq 0.8$ ) of allelic diversity in every population ( $N_{80\%}$ ) was visually assessed  
243 for each dataset independently (Appendix S6) and used to parametrize realistic simulations (Fig.  
244 1a). *Ex situ* collections were simulated 500 times using the realistic scenario to estimate genetic  
245 summary statistics regardless of the population sampling strategy used (Fig. 1a). For these  
246 simulations,  $N_{80\%}$  were often much lower than the existing size of most populations and  
247 performing repeated iterations accounted for the variation in genetic summary statistics  
248 introduced by small values of  $N_{80\%}$ .

249 Maintaining the range of  $A_s/A_p$  ratios across datasets is crucial as unbalanced variance may  
250 confound the influence of prioritization strategies in downstream analyses. Four of the 19  
251 datasets (*H. argophyllus* (Gen-SNPs), *M. lacinatus* (SSRs), *R. oldhamii* (EST-SSRs) and *S.*  
252 *leprosula* (EST-SSRs)) were discarded from realistic simulations as  $N_{80\%}$  values were not

253 reached for these datasets (Appendix S6). These same datasets were also removed from idealized  
254 simulations to ensure that differences in summary statistics between idealized and realistic  
255 simulations originated solely from variation in allelic diversity captured across populations  
256 introduced in the latter. See Appendix S7 for a complete list of parameters tested and used for  
257 simulations.

258

### 259 **Analysis of simulated data**

260 We tested whether prioritizing source population collection using environmental and/or  
261 geographic distance data influences genetic variation and differentiation captured *ex situ*. For  
262 every number of populations sampled ( $Np$ ), genetic summary statistics simulated using random  
263 sampling were subtracted from values based on prioritization strategies using environmental  
264 distances, geographic distances, or both. Summary statistics were averaged for each dataset  
265 following repeated iterations, grouped by distance-based strategies, genetic marker class, and  
266 simulation framework (idealized or realistic) (Fig. 2). Differences in genetic summary statistics  
267 are provided based on the proportion of populations sampled as the number of populations  
268 sampled for analysis varied across studies. For each dataset, we selected four numbers of  
269 populations sampled ( $Np$ ) representing between 30-40%, 50-60%, 70-80%, and 90-100% of  
270 populations present in a dataset (Appendix S7).

271 Finally, we fitted a linear model between proportions of populations sampled and differences  
272 in genetic summary statistics for every combination of genetic marker class, distance-based  
273 prioritization strategy, and simulation framework (Fig. 2). A negative relationship indicates that  
274 a given distance-informed sampling generally increases the genetic summary statistics relative to  
275 random sampling while a positive relationship would suggest the opposite. In addition, it is

276 important to note that a significant relationship (positive or negative) will always be approaching  
277 zero as the proportion of populations sampled increases. This is because with additional  
278 populations sourced, the probability that identical populations are sampled randomly or via  
279 distance-based strategies increases and will reach one when all populations are sampled. As the  
280 number of shared populations between sampling strategies increases, the difference in genetic  
281 summary statistics decreases.

282

## 283 **Results**

### 284 **Relative contributions of IBD and IBE to population genetic differentiation**

285 Variation partitioning revealed that IBD explained significantly more among-population  
286 genetic differences (13%) than IBE alone (5.5%) or  $IBD \cap IBE$  (3%) for neutral genetic datasets  
287 (Table 3). This contrasts with functional and adaptive datasets, where a significant proportion of  
288 among-population genetic differences was explained by geographically structured environmental  
289 variables relative to environmental or geographic factors alone (Table 3). Overall, 31% and 42%  
290 of population genetic differences were explained by  $IBD \cap IBE$  for functional and adaptive  
291 datasets, respectively, while only a small proportion was explained by IBD (functional: 10%,  
292 adaptive: 16%) and IBE alone (functional: 2.5%, adaptive: 1%).

293 While significant differences in the proportion of genetic differentiation explained were  
294 observed across genetic marker classes for  $IBD \cap IBE$  and  $IBD \cup IBE$ , no significant differences  
295 were observed in the individual contribution of IBD and IBE (Table 3).  $IBD \cup IBE$  explained the  
296 greatest proportion of genetic differences for adaptive genetic markers (71%), followed by  
297 functional (45%) and neutral (21.5%) genetic markers, respectively. Interestingly,  $IBD \cap IBE$   
298 explained substantial among-population genetic differences for both functional and adaptive

299 datasets but explained limited variation for neutral datasets (Table 3). The contribution of  
300 IBD $\cap$ IBE to population genetic differentiation for adaptive and functional datasets likely reflect  
301 high correlations observed between environmental and geographic distance matrices (Table 2;  
302 Appendix S5). Therefore, the relative contribution of geography and environment should be  
303 interpreted with caution for these genetic marker classes, as population genetic differentiation  
304 could not be partitioned solely by IBD or IBE.

305

### 306 **Genetic diversity and differentiation captured in simulated *ex situ* collections**

#### 307 Genetic differentiation (Nei's $F_{ST}$ )

308 Significant negative relationships were observed between proportions of populations sampled  
309 and changes in genetic differences ( $F_{ST}$ ) captured for collections simulated using both adaptive  
310 and functional datasets, but not neutral genetic datasets (Fig. 2a). This suggests that using  
311 environmental and/or geographic distance to prioritize population sampling may potentially  
312 increase adaptive and functional genetic differences but does not consistently impact neutral  
313 genetic variation. Simulations revealed that using all three distance-based population sampling  
314 strategies increased genetic differentiation captured among adaptive loci in *ex situ* collections  
315 (Fig. 2a). This contrasts with the results obtained for functional datasets, where sampling  
316 prioritizing source populations using environmental distance, or the combination of both  
317 environmental and geographic distances increased genetic differences captured.

318 For both adaptive and functional genetic makers classes, simulations based on realistic and  
319 idealized within-population sampling scenarios led to similar slopes, regardless of the distance-  
320 based population sampling strategy used (Fig. 2a; Appendix S8). This indicates that the ability of

321 distance-based population sampling strategies to increase  $F_{ST}$  among functional and adaptive loci  
322 was not impacted by the within-population sampling scenarios simulated.

323

324 Proportion of allelic diversity captured ( $A_c/A_d$ )

325 Both realistic and idealized *ex situ* collection simulations using functional and adaptive  
326 genetic datasets indicated allelic diversity captured ( $A_c/A_d$ ) is likely sensitive to within-  
327 population sampling. Prioritizing population sampling using environmental distances increased  
328 allelic diversity captured at functional loci under realistic within-population sampling conditions,  
329 but had no impact using idealized within-population sampling scenario (Fig. 2b). This contrasts  
330 with results obtained for adaptive datasets, where the opposite pattern was observed. Prioritizing  
331 population sampling using environmental or the combination of environmental and geographic  
332 distances increased  $A_c/A_d$  under idealized within-population sampling conditions (Fig. 2b).

333 For neutral genetic datasets no consistent change in allelic diversity was observed in response  
334 to varying proportions of population sampled, regardless of population prioritization strategy  
335 tested or within-population sampling scenario simulated (Fig. 2b). Together, these results suggest  
336 that incorporating environmental and/or geographic distances to prioritize collections may  
337 increase allelic diversity captured at functional and adaptive loci, but not at neutral loci.  
338 Nonetheless, simulations also indicate that increasing allelic diversity captured in *ex situ*  
339 collections is dependent on within-population sampling scenarios and may thus only be achieved  
340 under specific sampling conditions.

341

## 342 **Discussion**

343 Optimizing efforts to conserve genetic variation relies upon an understanding for how non-  
344 genetic factors, geographic and environmental variation, contribute to population genetic  
345 structure. Here, we leverage population provenance and environmental data to optimize genetic  
346 differences captured in simulated conservation collections. Environmental and geographic  
347 factors explain some portion of the genetic differences observed among populations, although  
348 the extent differs by genetic marker class. The proportion of genetic differentiation explained by  
349 IBDUIBE was significantly higher for adaptive and functional datasets relative to neutral  
350 datasets. This suggests that geographic and environmental data may provide a useful guide when  
351 designing *ex situ* population sampling, particularly where the goal is to conserve adaptive and  
352 functional genetic variation. We simulated *ex situ* sampling and found that, as predicted,  
353 strategies that included environmental and/or geographic distance data to prioritize population  
354 sampling increased genetic differences and diversity captured at both functional and adaptive  
355 loci. Overall, we suggest that inclusion of IBD and IBE in guiding *ex situ* sampling can ensure  
356 adaptive and functional genetic variation are conserved, crucial for long-term preservation and  
357 maintenance of species' evolutionary potential.

358 Consistent with previous plant studies, our results demonstrate that genetic differentiation  
359 across neutral, functional, and adaptive loci can, at least partly, be explained by environmental  
360 and geographic factors (Bjørnstad et al. 1995; Nadeau et al. 2016; Xia et al. 2018) (Table 2).  
361 Interestingly, limited genetic differentiation was explained by IBD or IBE alone across all three  
362 genetic marker classes. For functional and adaptive datasets, this is likely due to the fact that  
363 substantial genetic structure is explained by their intersection (Table 3). Indeed,  $IBD \cap IBE$   
364 reflects covariance between geographic and environmental factors that cannot be teased apart.



365 Additional empirical work minimizing this covariance would be required to completely  
366 disentangle these factors (Wang & Bradburd 2014). Nonetheless, when combined, environmental  
367 and geographic factors explained a substantial proportion of population genetic differentiation  
368 for both functional and adaptive datasets (IBDUIBE; Table 3). This suggests that geographic and  
369 environmental differences contribute largely to genetic divergence at nonneutral loci (Huang et  
370 al. 2016; Xia et al. 2018). Consequently, the inclusion of IBDUIBE may provide a means to  
371 capture adaptive and functional genetic variation *ex situ*. For neutral datasets, geographic and  
372 environmental factors, either individually (IBD, IBD) or cumulatively (IBDUIBE), explained  
373 very small proportions of among-population genetic differences (Table 3). This indicates that  
374 stochastic processes, such as genetic drift or founding events likely influence neutral genetic  
375 structure. Random fixation or loss of alleles through genetic drift (Stern & Orgogozo 2009) and  
376 accelerated allele fixation within populations following demographic changes, including  
377 bottlenecks or founder events (Maruyama & Fuerst 1985; Gavrillets & Hastings 1996), may lead  
378 to population structure that is not explained by environment or spatial data. Overall, our findings  
379 indicate that environmental and geographic distance metrics can be used to target genetic  
380 differences which likely reflect adaptive or functional genetic variation over neutral genetic  
381 variation.

382 *Ex situ* strategies relying on existing genetic datasets (Caujapé-Castells & Pedrola-Monfort  
383 2004; Gapare et al. 2008) or genetic simulations (Hoban & Schlarbaum 2014; Hoban 2019) have  
384 previously optimized variation captured in collections. These approaches require substantial *a*  
385 *priori* information and target neutral genetic variation. Where knowledge of population location  
386 is available, pairwise geographic and environmental distances may be leveraged to extend  
387 previous sampling to conserve adaptive and functional genetic variation. Our simulations

388 demonstrate that *ex situ* collections prioritized using environmental or the combination of  
389 environmental and geographic distances increase both Nei's  $F_{ST}$  and  $A_c/A_d$  captured for adaptive  
390 and functional datasets relative to random sampling (Fig. 2). This indicates that divergent  
391 selection and adaptation to local environments contribute to genetic differentiation at nonneutral  
392 loci (Hancock et al. 2011; Wang et al. 2016), likely influenced by IBE. IBE-based prioritization  
393 strategies suggest that part of the additional genetic differences captured in collections consist of  
394 spatially and/or environmentally restricted alleles (Fig. 2b). However, simulations also revealed  
395 that increasing allelic diversity captured in collections using distance-based prioritization  
396 strategies depends on within-population sampling conditions (realistic or idealized). These  
397 results have important applications to applied conservation efforts. First, a realistic sampling  
398 scenario was sufficient to increase genetic differentiation captured at adaptive and functional loci  
399 (Fig. 2a). This suggests that inclusion of IBD and IBE in population prioritization would likely  
400 increase among-population genetic differences captured at these loci by sampling only a subset  
401 of individuals within populations. However, only an idealized sampling scenario increased allelic  
402 diversity captured at adaptive loci (Fig. 2b). This indicates that extensive within-population  
403 sampling may be needed to increase adaptive allelic diversity conserved in collections. Overall,  
404 simulations demonstrate that prioritizing population sampling using IBD and/or IBE can increase  
405 genetic differences and diversity captured at both functional and adaptive loci without the need  
406 for prior genetic data, providing a means to target genetic variation that may be needed to  
407 maintain adaptive potential within collections.

408 Despite the fact conservation has long valued environmental and geographic data (Brown &  
409 Marshall 1995; Guerrant et al. 2004; Guerrant Jr et al. 2013), use of these data for conservation  
410 planning have only emerged during the past decade (Vinceti et al. 2013; Whitlock et al. 2016;

411 Hanson et al. 2017). Consistent with previous work, we observe inconsistent benefits of  
412 leveraging geography for the preservation of neutral genetic diversity (Fig. 2). This could be due  
413 to the fact that gene flow between populations may be disturbed by landscape characteristics  
414 (Dudaniec et al. 2016), or some species may exhibit greater gene flow between geographically  
415 distant populations (O’Connell et al. 2007). Our results do provide additional empirical support  
416 for inclusion of environmental and geographic data in conservation planning, to target and  
417 increase adaptive genetic diversity conserved (Hanson et al. 2017) (Fig. 2). In addition, this study  
418 is the first to provide evidence that IBD- and/or IBE-based population prioritization strategies  
419 may increase genetic differentiation and diversity captured at functional loci. This indicates that  
420 using environmental and/or geographic surrogates may not only preserve current adaptive  
421 genetic diversity but may also secure genetic variation crucial for future adaptations. Finally,  
422 where other studies use amplified fragment length polymorphisms (AFLPs; Whitlock et al. 2016;  
423 Hanson et al. 2017), we focus on SSRs and SNPs datasets. The concordance across studies  
424 suggests a broad applicability for environmental and geographic data to act as surrogates to  
425 optimize the conservation of genetic variation.

426 Although simulations are a powerful inferential tool, they can include a number of  
427 assumptions. Here, we assumed that maternal plants used in realistic and idealized simulations  
428 were collected for storage *ex situ*. However, the progeny of these plants more accurately reflects  
429 those likely to be included in collections (FAO, 2010). Future studies will need to consider  
430 empirical or simulated progeny data to evaluate whether environmental and/or geographic  
431 distance-based prioritization captures genetic variation across generations. In this study, we  
432 evaluated the overall impact of population sampling strategies on genetic variation and  
433 differentiation captured in *ex situ* collections. Nonetheless, simulations revealed important

434 variation in genetic summary statistics across datasets within genetic marker classes (Fig. 2).  
435 This variation is likely introduced by differences in species' life history traits including mode of  
436 reproduction and breeding system (Loveless & Hamrick 1984). Despite this variance, our data  
437 suggest that inclusion of IBD and IBE in *ex situ* guidelines may still be valuable to optimizing  
438 functional and adaptive genetic variation captured. Future work assessing the influence trait  
439 combinations may have on predicting genetic variation captured in collections will complement  
440 the present research, providing sampling guidelines for species exhibiting specific life history  
441 characteristics. Finally, we grouped different genetic markers into genetic diversity classes to test  
442 the effect of prioritizing population sampling using environmental and/or geographic data at a  
443 broader scale. However, allelic distributions and mutation models largely differ between these  
444 genetic markers. Thus, future work should evaluate marker-specific patterns associated with  
445 IBD- and IBE-based prioritization strategies.

446 Anthropogenic changes have had substantial impacts on global biodiversity, resulting in a  
447 global call for the preservation of biodiversity. This research expands existing *ex situ* population  
448 sampling strategies, leveraging geographic provenance and environmental distance to increase  
449 functional and adaptive genetic differences conserved in collections. Incorporating an  
450 understanding of evolutionary and ecological processes influencing population structure  
451 alongside new and existing datasets will be critical to enhancing current conservation practice.

452

### 453 **Supporting Information**

454 Reference and availability information associated with every genetic and genomic dataset  
455 (Appendix S1), modifications applied to genetic and genomic datasets (Appendix S2), raw set of  
456 climatic variables used in simulations and variation partitioning analyses (Appendix S3),

457 proportion of variance explained by the two major environmental principal components for each  
458 dataset (Appendix S4), covariance between environmental, geographic and genetic distances  
459 (Appendix S5), proportion of allelic diversity captured within populations using  $N_{80\%}$  or the size  
460 of the smallest population within datasets (Appendix S6), a list of tested and used parameters for  
461 realistic and idealized simulations (Appendix S7), and regression statistics associated with  
462 realistic and idealized simulations (Appendix S8) are available online.

463

#### 464 **Acknowledgments**

465 The authors thank the Hamilton Lab, T. L. Parchman, and S. M. Hoban for their valuable  
466 comments on early versions of this manuscript. This work was supported by a new faculty award  
467 from the office of the North Dakota Experimental Program to Stimulate Competitive Research  
468 (ND-EPSCoR NSF-IIA-1355466) and funding from the NDSU Environmental and Conservation  
469 Sciences Program to J.A.H.

470

#### 471 **Literature Cited**

472 Bjørnstad ON, Iversen A, Hansen M. 1995. The spatial structure of the gene pool of a viviparous  
473 population of *Poa alpina*—environmental controls and spatial constraints. *Nordic Journal of*  
474 *Botany* **15**:347–354. Wiley Online Library.

475 Brown AHD, Marshall DR. 1995. A basic sampling strategy: theory and practice. *Collecting*  
476 *plant genetic diversity: technical guidelines*. CAB International, Wallingford:75–91.

477 Carlson SM, Cunningham CJ, Westley PAH. 2014. Evolutionary rescue in a changing world.  
478 *Trends in Ecology and Evolution* **29**:521–530.

479 Caujapé-Castells J, Pedrola-Monfort J. 2004. Designing ex-situ conservation strategies through

- 480 the assessment of neutral genetic markers: application to the endangered *Androcymbium*  
481 *gramineum*. *Conservation Genetics* **5**:131–144. Springer.
- 482 Dobzhansky TG. 1937. *Genetics and the origin of species*. New York City. NY Columbia  
483 University Press.
- 484 Dowle M, Srinivasan A. 2019. data.table: Extension of ‘data.frame’. R package version 1.12.6.  
485 <https://CRAN.R-project.org/package=data.table>.
- 486 Dudaniec RY, Worthington Wilmer J, Hanson JO, Warren M, Bell S, Rhodes JR. 2016. Dealing  
487 with uncertainty in landscape genetic resistance models: a case of three co-occurring  
488 marsupials. *Molecular ecology* **25**:470–486. Wiley Online Library.
- 489 FAO. 2010. *The second report on the state of the world’s plant genetic resources for food and*  
490 *agriculture*. Food & Agriculture Org.
- 491 Gapare WJ, Yanchuk AD, Aitken SN. 2008. Optimal sampling strategies for capture of genetic  
492 diversity differ between core and peripheral populations of *Picea sitchensis* (Bong.) Carr.  
493 *Conservation Genetics* **9**:411–418. Springer.
- 494 Gavrilets S, Hastings A. 1996. Founder effect speciation: a theoretical reassessment. *The*  
495 *American Naturalist* **147**:466–491. University of Chicago Press.
- 496 Goudet J. 2005. Hierfstat, a package for R to compute and test hierarchical  $F_{ST}$  statistics.  
497 *Molecular Ecology Resources* **5**:184–186. Wiley Online Library.
- 498 Guerrant EO, Havens K, Maunder M. 2004. *Ex situ plant conservation: supporting species*  
499 *survival in the wild*. Island Press.
- 500 Guerrant Jr EO, Havens K, Vitt P. 2013. Sampling for effective ex situ plant conservation.  
501 *International Journal of Plant Sciences* **175**:11–20. University of Chicago Press Chicago, IL.
- 502 Hancock AM, Brachi B, Faure N, Horton MW, Jarymowycz LB, Sperone FG, Toomajian C,

- 503 Roux F, Bergelson J. 2011. Adaptation to Climate Across the *Arabidopsis*  
504 *thaliana* Genome. *Science* **334**:83 LP – 86. Available from  
505 <http://science.sciencemag.org/content/334/6052/83.abstract>.
- 506 Hanson JO, Rhodes JR, Riginos C, Fuller RA. 2017. Environmental and geographic variables are  
507 effective surrogates for genetic variation in conservation planning. *Proceedings of the*  
508 *National Academy of Sciences* **114**:12755–12760. *National Acad Sciences*.
- 509 Hoban S. 2019. New guidance for ex situ gene conservation: Sampling realistic population  
510 systems and accounting for collection attrition. *Biological Conservation* **235**:199–208.  
511 Elsevier.
- 512 Hoban S, Schlarbaum S. 2014. Optimal sampling of seeds from plant populations for ex-situ  
513 conservation of genetic biodiversity, considering realistic population structure. *Biological*  
514 *Conservation* **177**:90–99.
- 515 Huang C-L, Chen J-H, Chang C-T, Chung J-D, Liao P-C, Wang J-C, Hwang S-Y. 2016.  
516 Disentangling the effects of isolation-by-distance and isolation-by-environment on genetic  
517 differentiation among *Rhododendron* lineages in the subgenus *Tsutsusi*. *Tree genetics &*  
518 *genomes* **12**:53. Springer.
- 519 Jombart T. 2008. adegenet: a R package for the multivariate analysis of genetic markers.  
520 *Bioinformatics* **24**:1403–1405. Oxford Univ Press.
- 521 Keller M, Kollmann J, Edwards PJ. 2000. Genetic introgression from distant provenances  
522 reduces fitness in local weed populations. *Journal of applied ecology* **37**:647–659. Wiley  
523 Online Library.
- 524 Lawrence MJ, Marshall DF, Davies P. 1995. Genetics of genetic conservation. I. Sample size  
525 when collecting germplasm. *Euphytica* **84**:89–99. Available from

- 526 <https://doi.org/10.1007/BF01677945>.
- 527 Ledig FT. 2000. Founder effects and the genetic structure of Coulter pine. *Journal of Heredity*
- 528 **91**:307–315. Oxford University Press.
- 529 Li Q, Xu Z, He T. 2002. Ex situ genetic conservation of endangered *Vatica guangxiensis*
- 530 (Dipterocarpaceae) in China. *Biological Conservation* **106**:151–156. Elsevier.
- 531 Lockwood DR, Richards CM, Volk GM. 2007. Probabilistic models for collecting genetic
- 532 diversity: comparisons, caveats, and limitations. *Crop Science* **47**:861–866.
- 533 Loveless MD, Hamrick JL. 1984. Ecological determinants of genetic structure in plant
- 534 populations. *Annual review of ecology and systematics* **15**:65–95. Annual Reviews 4139 El
- 535 Camino Way, PO Box 10139, Palo Alto, CA 94303-0139, USA.
- 536 Lowry DB, Rockwood RC, Willis JH. 2008. Ecological reproductive isolation of coast and
- 537 inland races of *Mimulus guttatus*. *Evolution: International Journal of Organic Evolution*
- 538 **62**:2196–2214. Wiley Online Library.
- 539 Maruyama T, Fuerst PA. 1985. Population bottlenecks and nonequilibrium models in population
- 540 genetics. II. Number of alleles in a small population that was formed by a recent bottleneck.
- 541 *Genetics* **111**:675–689. Genetics Soc America.
- 542 McBride CS, Singer MC. 2010. Field studies reveal strong postmating isolation between
- 543 ecologically divergent butterfly populations. *PLoS biology* **8**. Public Library of Science.
- 544 Nadeau S, Meirmans PG, Aitken SN, Ritland K, Isabel N. 2016. The challenge of separating
- 545 signatures of local adaptation from those of isolation by distance and colonization history:
- 546 The case of two white pines. *Ecology and evolution* **6**:8649–8664. Wiley Online Library.
- 547 Naredo MEB, Mercado SMQ, Banaticla-Hilario MCN, Berdos ML, Rodriguez MA, McNally
- 548 KL, Hamilton RS. 2017. Genetic diversity patterns in ex situ collections of *Oryza officinalis*



- 549 Wall. ex G. Watt revealed by morphological and microsatellite markers. *Genetic Resources*  
550 *and Crop Evolution* **64**:733–744. Springer.
- 551 Nei M. 1987. *Molecular evolutionary genetics*. Columbia university press.
- 552 O’Connell LM, Mosseler A, Rajora OP. 2007. Extensive long-distance pollen dispersal in a  
553 fragmented landscape maintains genetic diversity in white spruce. *Journal of Heredity*  
554 **98**:640–645. Oxford University Press.
- 555 Oksanen J, Kindt R, Legendre P, O’Hara B, Stevens MHH, Oksanen MJ, Suggests M. 2007. The  
556 vegan package. *Community ecology package* **10**:631–637.
- 557 Sexton JP, Hangartner SB, Hoffmann AA. 2014. Genetic isolation by environment or distance:  
558 which pattern of gene flow is most common? *Evolution* **68**:1–15. Wiley Online Library.
- 559 Sharrock S, Hoft R, Dias BF de S. 2018. An overview of recent progress in the implementation  
560 of the Global Strategy for Plant Conservation-a global perspective. *Rodriguésia* **69**:1489–  
561 1511. SciELO Brasil.
- 562 Slatkin M. 1993. Isolation by distance in equilibrium and non-equilibrium populations.  
563 *Evolution* **47**:264–279. Wiley Online Library.
- 564 Stern DL, Orgogozo V. 2009. Is genetic evolution predictable? *Science* **323**:746–751. American  
565 Association for the Advancement of Science.
- 566 Vinceti B, Loo J, Gaisberger H, van Zonneveld MJ, Schueler S, Konrad H, Kadu CAC, Geburek  
567 T. 2013. Conservation priorities for *Prunus africana* defined with the aid of spatial analysis  
568 of genetic data and climatic variables. *PloS one* **8**. Public Library of Science.
- 569 Wang IJ, Bradburd GS. 2014. Isolation by environment. *Molecular ecology* **23**:5649–5662.  
570 Wiley Online Library.
- 571 Wang IJ, Summers K. 2010. Genetic structure is correlated with phenotypic divergence rather

572 than geographic isolation in the highly polymorphic strawberry poison  $\square$  dart frog.  
573 *Molecular Ecology* **19**:447–458. Wiley Online Library.

574 Wang T, Wang Z, Xia F, Su Y. 2016. Local adaptation to temperature and precipitation in  
575 naturally fragmented populations of *Cephalotaxus oliveri*, an endangered conifer endemic to  
576 China. *Scientific reports* **6**. Nature Publishing Group.

577 Westengen OT, Jeppson S, Guarino L. 2013. Global ex-situ crop diversity conservation and the  
578 Svalbard Global Seed Vault: Assessing the current status. *PloS one* **8**:e64146. Public  
579 Library of Science.

580 Whitlock R, Hipperson H, Thompson DBA, Butlin RK, Burke T. 2016. Consequences of in-situ  
581 strategies for the conservation of plant genetic diversity. *Biological Conservation* **203**:134–  
582 142. Elsevier.

583 Wright S. 1943. Isolation by distance. *Genetics* **28**:114. Genetics Society of America.

584 Xia H, Wang B, Zhao W, Pan J, Mao J, Wang X. 2018. Combining mitochondrial and nuclear  
585 genome analyses to dissect the effects of colonization, environment, and geography on  
586 population structure in *Pinus tabuliformis*. *Evolutionary Applications* **11**:1931–1945. Wiley  
587 Online Library.

588

589 **Tables**

590 **Table 1** Evolutionary processes <sup>a</sup> contributing to genetic structure across neutral and adaptive  
591 genetic markers and their predicted weight <sup>b</sup> on expected patterns of among-population genetic  
592 differentiation (Random, IBD and IBE).

| <b>Neutral genetic markers</b>                        | Random | IBD | IBE |
|-------------------------------------------------------|--------|-----|-----|
| Stochastic processes (e.g. genetic drift, inbreeding) | ++     | -   | -   |
| Demographic history (e.g. founder events)             | ++     | +   | -   |
| Genetic drift combined with gene flow                 | -      | +++ | -   |
| Natural selection                                     | -      | -   | +   |
| <b>Adaptive genetic markers</b>                       | Random | IBD | IBE |
| Stochastic processes (e.g. genetic drift, inbreeding) | - (+)  | -   | -   |
| Demographic history (e.g. founder events)             | -      | -   | -   |
| Genetic drift combined with gene flow                 | -      | +   | -   |
| Natural selection                                     | -      | -   | +++ |

593 <sup>a</sup> Here we distinguish between genetic drift alone as a stochastic evolutionary force and genetic  
594 drift combined with gene flow as a process leading to a pattern of IBD.

595 <sup>b</sup> -: no, +: small, ++: intermediate and +++: important influence of the evolutionary forces on the  
596 specified pattern.

597 **Table 2** Proportion of genetic differentiation explained by environmental and geographic variables <sup>a</sup>, obtained using variation  
 598 partitioning analyses, and correlation coefficients estimated between pairwise geographic and environmental Euclidean distances for  
 599 all 19 genetic and genomic datasets downloaded from Dryad (see Appendix S1).

| Study system                               |                   | Data                  |                             | Results                       |                               |                                   |                                   |                   |
|--------------------------------------------|-------------------|-----------------------|-----------------------------|-------------------------------|-------------------------------|-----------------------------------|-----------------------------------|-------------------|
| Species                                    | Distribution      | Number of Populations | Genetic Marker <sup>d</sup> | IBD<br>(Adj. R <sup>2</sup> ) | IBE<br>(Adj. R <sup>2</sup> ) | IBD∩IBE<br>(Adj. R <sup>2</sup> ) | IBD∪IBE<br>(Adj. R <sup>2</sup> ) | Corr.<br>(r)      |
| <i>Betula maximowicziana</i>               | Japan             | 48                    | EST-SSRs                    | 0.02                          | 0.02                          | 0.42                              | 0.46 <sup>e</sup>                 | 0.48 <sup>e</sup> |
| <i>Centaurea solstitialis</i> <sup>b</sup> | Eurasia           | 25                    | SNPs                        | 0.14 <sup>e</sup>             | 0.33 <sup>e</sup>             | 0                                 | 0.47 <sup>e</sup>                 | -0.02             |
| <i>Helianthus annuus</i>                   | North America     | 15                    | SNPs                        | 0.1 <sup>e</sup>              | 0.08 <sup>f</sup>             | 0.02                              | 0.2 <sup>e</sup>                  | 0.93 <sup>e</sup> |
| <i>Helianthus argophyllus</i> <sup>b</sup> | Texas             | 51                    | Gen-SNPs                    | 0.02                          | 0.04 <sup>e</sup>             | 0.32                              | 0.38 <sup>e</sup>                 | 0.9 <sup>e</sup>  |
| <i>Mimulus guttatus</i> <sup>b</sup>       | United Kingdom    | 14                    | SNPs                        | 0.14                          | 0.09                          | 0                                 | 0.23                              | 0.56 <sup>e</sup> |
| <i>Mimulus laciniatus</i> <sup>b</sup>     | California        | 23                    | SSRs                        | 0.01                          | 0.03                          | 0.04                              | 0.08 <sup>f</sup>                 | 0.35 <sup>e</sup> |
| <i>Narcissus papyraceus</i> <sup>b</sup>   | Spain and Morocco | 26                    | SSRs                        | 0.12 <sup>f</sup>             | 0.03                          | 0.02                              | 0.17 <sup>f</sup>                 | 0.08              |
| <i>Nothofagus alpina</i>                   | Chile             | 12                    | SSRs                        | 0                             | 0                             | 0.18                              | 0.18                              | 0.49 <sup>e</sup> |
| <i>Nothofagus glauca</i>                   | Chile             | 8                     | SSRs                        | 0.75 <sup>e</sup>             | 0.05                          | 0.06                              | 0.86 <sup>e</sup>                 | 0.2               |
| <i>Nothofagus obliqua</i>                  | Chile             | 20                    | SSRs                        | 0.17 <sup>e</sup>             | 0.06                          | 0.39                              | 0.62 <sup>e</sup>                 | 0.31 <sup>e</sup> |
| <i>Picea sitchensis</i> <sup>b</sup>       | North America     | 10                    | Gen-SNPs                    | 0.07                          | 0                             | 0.37                              | 0.44                              | 0.44 <sup>e</sup> |
|                                            |                   | 10                    | SEL-SNPs                    | 0.15                          | 0                             | 0.56                              | 0.71 <sup>f</sup>                 | 0.44 <sup>e</sup> |
| <i>Populus balsamifera</i> <sup>b</sup>    | North America     | 31                    | Gen-SNPs                    | 0.35 <sup>e</sup>             | 0.01                          | 0.3                               | 0.66 <sup>e</sup>                 | 0.42 <sup>e</sup> |
|                                            |                   | 31                    | SEL-SNPs                    | 0.32 <sup>e</sup>             | 0.01                          | 0.42                              | 0.75 <sup>e</sup>                 | 0.42 <sup>e</sup> |
| <i>Populus</i>                             | Sweden            | 12                    | Gen-SNPs                    | 0.02                          | 0                             | 0.02                              | 0.04                              | 0.71 <sup>e</sup> |

|                              |                 |    |                           |                   |      |      |                   |                   |
|------------------------------|-----------------|----|---------------------------|-------------------|------|------|-------------------|-------------------|
| <i>tremula</i> <sup>c</sup>  |                 |    | [control set]<br>Gen-SNPs | 0.15              | 0.05 | 0.33 | 0.53 <sup>e</sup> | 0.71 <sup>e</sup> |
|                              |                 | 12 | [defense set]<br>SEL-SNPs | 0.16              | 0.07 | 0.25 | 0.48 <sup>e</sup> | 0.71 <sup>e</sup> |
| <i>Rhododendron oldhamii</i> | Taiwan          | 18 | EST-SSRs                  | 0.13 <sup>e</sup> | 0.05 | 0.24 | 0.42 <sup>e</sup> | 0.29 <sup>e</sup> |
| <i>Shorea leprosula</i>      | South-East Asia | 24 | EST-SSRs                  | 0.24 <sup>e</sup> | 0.03 | 0.25 | 0.52 <sup>e</sup> | 0.27 <sup>e</sup> |

600 <sup>a</sup> Proportion of population genetic differentiation explained by pure geographic factors (IBD), pure environmental factors (IBE), the  
 601 shared variation between environmental and geographic factors (IBD∩IBE), and both environmental and geographic factors combined  
 602 (IBD∪IBE).

603 <sup>b</sup> Subsampled genetic or genomic datasets; <sup>c</sup> Adjusted geographical coordinates

604 <sup>d</sup> SSR (single-sequence repeat, neutral class), EST-SSR (expressed sequence tag single-sequence repeat, functional class), SNPs  
 605 (genome-wide single-nucleotide polymorphism, neutral class), Gen-SNPs (genic single-nucleotide polymorphism, functional class)  
 606 and SEL-SNPs (single-nucleotide polymorphism identified as potentially under selection, adaptive class).

607 <sup>e, f</sup> Fractions of variation explained and correlation coefficients are significant ( $\alpha=0.05$ <sup>f</sup>,  $\alpha=0.1$ <sup>g</sup>).

608 **Table 3** Median proportion and 95% CI\* of population genetic differences explained by IBD, IBE,  $IBD \cap IBE$ , and  $IBD \cup IBE$  given by  
 609 genetic marker classes.

| Genetic Marker Class | IBD                        | IBE                        | $IBD \cap IBE$             | $IBD \cup IBE$             |
|----------------------|----------------------------|----------------------------|----------------------------|----------------------------|
|                      | Median Adj. $R^2$ (95% CI) | Median Adj. $R^2$ (95% CI) | Median Adj. $R^2$ (95% CI) | Median Adj. $R^2$ (95% CI) |
| Neutral              | 0.13 (0.09, 0.25)          | 0.055 (0.02, 0.08)         | 0.03 (-0.12, 0.06)         | 0.215 (-0.19, 0.26)        |
| Functional           | 0.1 (-0.04, 0.18)          | 0.025 (0, 0.045)           | 0.31 (0.25, 0.38)          | 0.45 (0.37, 0.52)          |
| Adaptive             | 0.16 (0, 0.17)             | 0.01 (-0.05, 0.02)         | 0.42 (0.28, 0.59)          | 0.71 (0.67, 0.94)          |

610 \* 95% CI were obtained by bootstrapping. We considered two medians to be significantly different ( $\alpha=0.05$ ) if their confidence  
 611 intervals did not overlap.

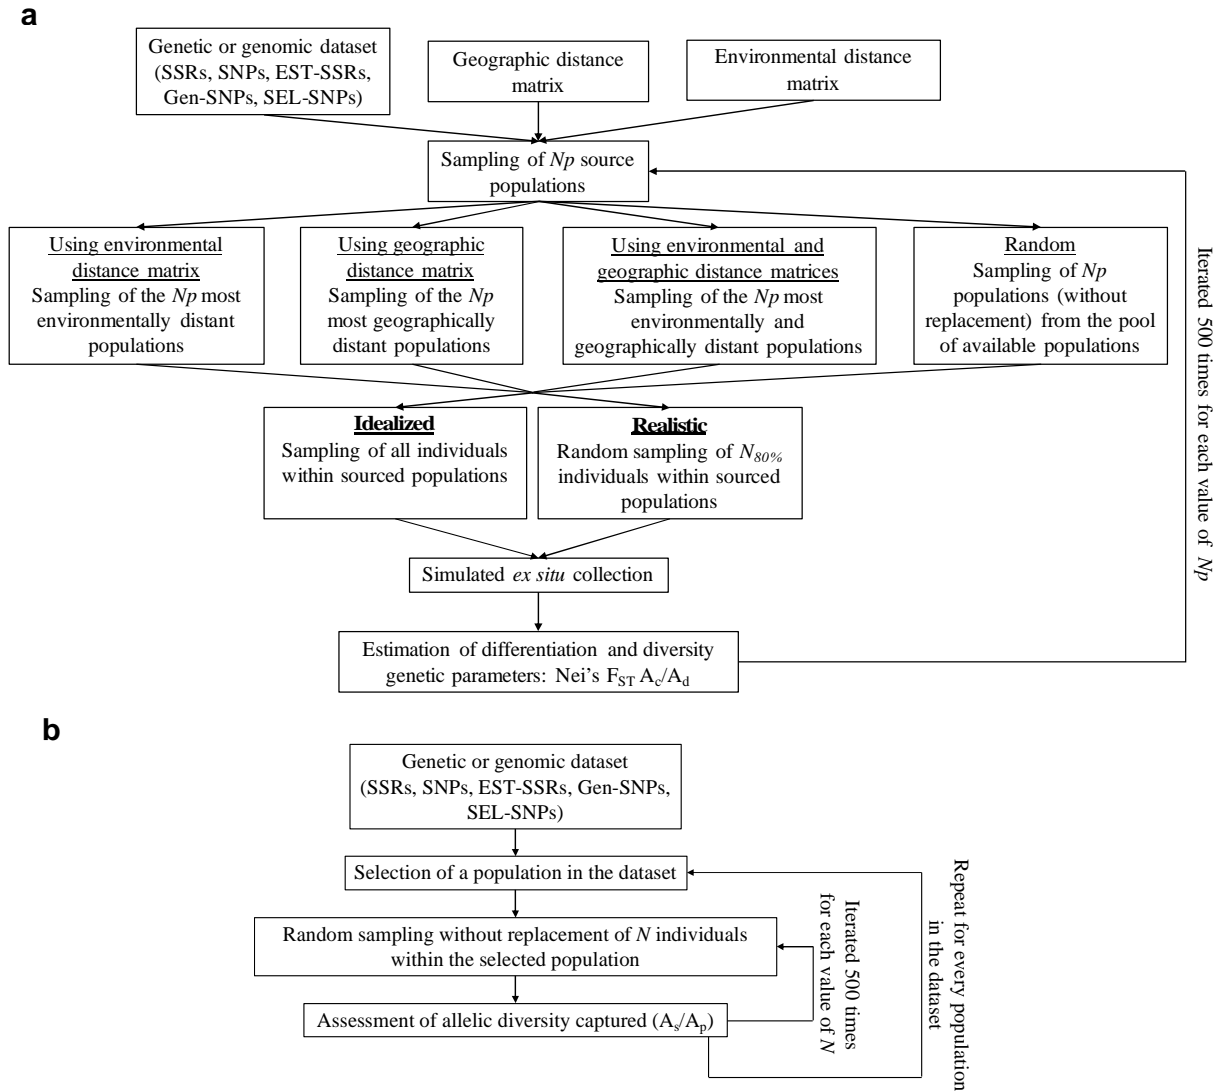

1  
2 **Figure 1** (a) Simulation framework used to estimate genetic variation and differentiation  
3 parameters in *ex situ* collections simulated under two different within-population sampling  
4 scenarios (realistic and idealized) and four distinct population prioritization strategies (random,  
5 based on environmental distance, based on geographic distance, and based on both  
6 environmental and geographic distance combined). (b) Simulation framework used to estimate  
7 the number of individuals required to capture between 80-100% of allelic diversity in every  
8 population of a dataset ( $N_{80\%}$ , see Figure 1a). Simulations using both frameworks were  
9 conducted on each dataset independently. Computation proceeds from top to bottom.

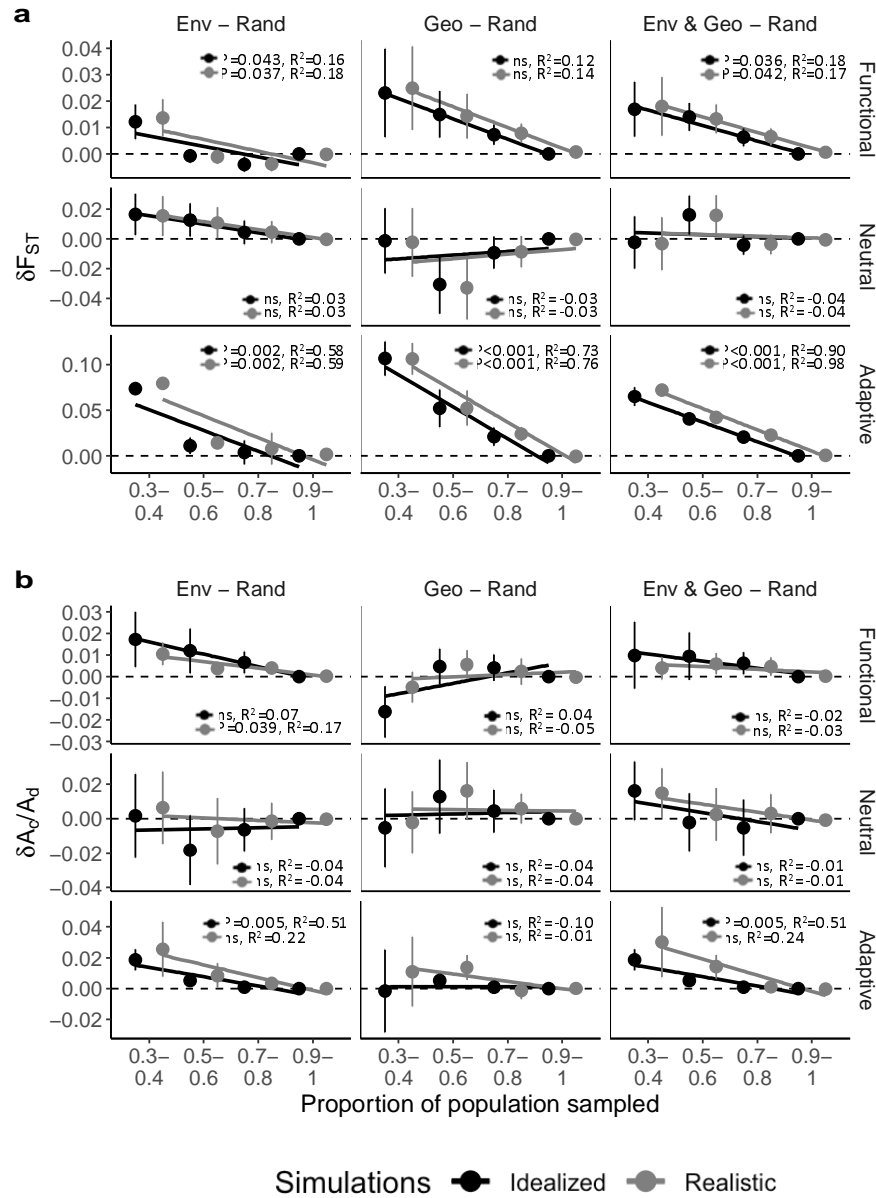

10

11

12 **Figure 2** Average differences and SE across datasets in genetic summary statistics (y-axis)

13 estimated from *ex situ* collections simulated using distance-informed (environmental: Env,

14 geographic: Geo, environmental and geographic: Env & Geo) and random (Rand) population

15 sampling strategies (columns) separated by genetic marker classes (rows). Differences in genetic

16 summary statistics were estimated for various proportions of populations sampled (x-axis). (a)

17 Populations genetic differentiation (Nei's  $F_{ST}$ ). (b) Allelic diversity captured in simulated *ex situ*

18 collections ( $A_c/A_d$ ). ns: non-significant.
